# Supplementary material
Source: PubMed Central journal article supplement (PMC4775963)
Supplement: AAC.01777-15_zac002164829so1.pdf [file AAC.01777-15_zac002164829so1.pdf]

**TABLE S1. *MDR1* and *PDR11* PCR Conditions**

| Construct                   | Primers              | Sequences (5' to 3')                  | PCR Conditions                                                                                                        | Product Sizes (bp) |
|-----------------------------|----------------------|---------------------------------------|-----------------------------------------------------------------------------------------------------------------------|--------------------|
| pCR2.1:MDR1                 | gMDR_F57             | TCGCTTTTTTCGCCACTTACT                 | 94°C for 2 min, 30 cycles at 94°C for 30 sec, 55°C for 30 sec, 68°C for 10 min, and final extension at 68°C for 7 min | 5580               |
|                             | gMDR1_R5637          | TCAGGTTTTGCATTTGAACG                  |                                                                                                                       |                    |
| Fragment from pCR2.1: MDR1  | MDR_topo PacI F5098  | CATTTAATTAACGCTTTCAGTGTGGCTCTCGTTGGTC | Same as gMDR_F57 and gMDR_F5637 with T <sub>annealing</sub> of 58°C                                                   |                    |
|                             | MDR_topo AvrII R1323 | CATCCTAGGGACAAGATCCGGCAGCAATAGCAA     |                                                                                                                       |                    |
| HYG fragment from pJAF15    | pJAF15&1 AvrII 001F  | CATCCTAGGCAGTGTGATGGATATCTGCAGAATTCG  | 94°C for 2 min, 30 cycles at 94°C for 30 sec, 56°C for 30 sec, 68°C for 4 min, and final extension at 68°C for 7 min. |                    |
|                             | pJAF15&1 PacI 001R   | CCGTTAATTAAGTGCTGGAATTCGCCCTTGGTTTATC |                                                                                                                       |                    |
| Entire MDR1 wild type gene  | gMDR_F912            | TTGTGGCATGTTTCTCGTGCAG                | Same as MDR_topo PacI F5098 and MDR_topo AvrII R1323                                                                  | 7131               |
|                             | gMDR_R8119           | CCTCGCTCTGTCTACGACAATT                |                                                                                                                       |                    |
| pCR2.1:PDR11                | cgPDR11_F2192        | TCTTTGGCGTAAATCCCTTTGC                | Same as gMDR_F57 and gMDR_F5637 with T <sub>annealing</sub> of 54°C                                                   | 5622               |
|                             | cgPDR11_R7814        | CACAGTTCCTCTTCCACTTGT                 |                                                                                                                       |                    |
| Fragment from pCR2.1: PDR11 | CgPDR11_PacI F5166   | ATGTTAATTAAGTGCAGTGTACGGCCCCCTC       | Same as MDR_topo PacI F5098 and MDR_topo AvrII R1323                                                                  | 5116               |
|                             | CgPDR11_AvrII R2584  | CATCCTAGGCATCTTGGAAGTCTTGCA           |                                                                                                                       |                    |
| Entire PDR11 wild type gene | cgPDR11_F1011        | GAACGCTGAGCAAGCAAGTATC                | Same as MDR_topo PacI F5098 and MDR_topo AvrII R1323                                                                  | 7097               |
|                             | cgPDR11_R8108        | CACCCATTAGCACGCAAACCA                 |                                                                                                                       |                    |
